# Supplementary material for: Multivariate pattern dependence
Source: PubMed Central journal article supplement (PMC5714382; doi:10.1371/journal.pcbi.1005799), 2017-11-20
Supplement: pcbi.1005799.s005.pdf [file pcbi.1005799.s005.pdf]

**Supplementary Table 1.** Experiment 1: peaks of functional connectivity with the pSTS seed.

| <b>Region Name</b>   | <b>Peak MNI</b> |          |          | <b>SnPM T</b> |
|----------------------|-----------------|----------|----------|---------------|
|                      | <b>x</b>        | <b>y</b> | <b>z</b> |               |
| Right STS            | 54              | -9       | -15      | 8.5           |
| Left STS             | -52             | -27      | -6       | 8.9           |
| Right STS, posterior | 55              | -57      | 10       | 6.1           |
