# Supplementary material for: Multivariate pattern dependence
Source: PubMed Central journal article supplement (PMC5714382; doi:10.1371/journal.pcbi.1005799), 2017-11-20
Supplement: pcbi.1005799.s006.pdf [file pcbi.1005799.s006.pdf]

**Supplementary Table 2.** Experiment 1: peaks of MVPD with the pSTS seed.

| <b>Region Name</b>   | <b>Peak MNI</b> |          |          | <b>SnPM T</b> |
|----------------------|-----------------|----------|----------|---------------|
|                      | <b>x</b>        | <b>y</b> | <b>z</b> |               |
| Right STS            | 63              | -32      | -4       | 7.3           |
| Left STS             | -62             | -11      | -14      | 7.3           |
| Right STS, posterior | 55              | -55      | 13       | 7.2           |
| Left STS, posterior  | -57             | -42      | 1        | 7.9           |
| Posterior Cingulate  | 0               | -71      | 34       | 8.6           |
