# Supplementary material for: Multivariate pattern dependence
Source: PubMed Central journal article supplement (PMC5714382; doi:10.1371/journal.pcbi.1005799), 2017-11-20
Supplement: pcbi.1005799.s007.pdf [file pcbi.1005799.s007.pdf]

**Supplementary Table 3.** Experiment 2: peaks of functional connectivity with the FFA seed.

| <b>Region Name</b>   | <b>Peak MNI</b> |          |          | <b>SnPM T</b> |
|----------------------|-----------------|----------|----------|---------------|
|                      | <b>x</b>        | <b>y</b> | <b>z</b> |               |
| Early visual cortex  | 12              | -90      | -7       | 14.1          |
| Right Insula         | 34              | 26       | 1        | 13.3          |
| Thalamus             | -9              | -23      | 11       | 9.2           |
| V7                   | 14              | -70      | 43       | 12.3          |
| Intraparietal Sulcus | 30              | -66      | 32       | 14.5          |
