# Supplementary material for: Multivariate pattern dependence
Source: PubMed Central journal article supplement (PMC5714382; doi:10.1371/journal.pcbi.1005799), 2017-11-20
Supplement: pcbi.1005799.s008.pdf [file pcbi.1005799.s008.pdf]

**Supplementary Table 4.** Experiment 2: peaks of MVPD with the FFA seed.

| <b>Region Name</b>  | <b>Peak MNI</b> |          |          | <b>SnPM T</b> |
|---------------------|-----------------|----------|----------|---------------|
|                     | <b>x</b>        | <b>y</b> | <b>z</b> |               |
| Early visual cortex | 12              | -87      | -12      | 14.3          |
| Right Insula        | 51              | 23       | -2       | 14.7          |
| Thalamus            | -9              | -23      | 11       | 21.1          |
| V7                  | 14              | -76      | 43       | 16.7          |
| Posterior Cingulate | 8               | -46      | 38       | 13.5          |
| Right STS           | 51              | -25      | -4       | 14.4          |
| Right ATL           | 26              | 6        | -33      | 10.5          |
| rDMPFC              | 53              | 12       | 23       | 16.5          |
| V3A                 | 15              | -88      | 31       | 13.4          |
